# Supplementary material
Source: Springer Nature journal article supplement (https://www.springermedizin.de/resource/supplementary/13075_2004_1584_MOESM4_ESM.pdf/9690110)
Supplement: MOESM4 [file 9690110]

Additional file 4: Detailed endoscopic outcomes

| Study #<br>condition<br>duration                              | Methods                                                                                                                                                       | Dosing regimen, numbers of<br>patients                                                                                                        | Gastroduodenal ulcers                                                                | Ulcers with aspirin                                                            | Ulcers without aspirin                                                               | Comment                                                                                        |
|---------------------------------------------------------------|---------------------------------------------------------------------------------------------------------------------------------------------------------------|-----------------------------------------------------------------------------------------------------------------------------------------------|--------------------------------------------------------------------------------------|--------------------------------------------------------------------------------|--------------------------------------------------------------------------------------|------------------------------------------------------------------------------------------------|
| <b>C-021</b><br>OA<br>12 weeks                                | Endoscopy at baseline and 12 weeks (or early termination)<br>Washout:<br>NSAID/analgesic 48 hrs<br>Piroxicam/oxaprozin 4 days<br>Investigational drug 30 days | Cele [1] 2x50mg/day (n=258)<br>Cele [2] 2x100mg/day (n=239)<br>Cele [3] 2x200mg/day (n=237)<br>Naprox 2x500mg/day (n=233)<br>Plac (n=247)     | Cele [1] 8/233<br>Cele [2] 7/227<br>Cele [3] 13/221<br>Naprox 34/210<br>Plac 5/217   | Cele [1] 3/28<br>Cele [2] 1/31<br>Cele [3] 5/33<br>Naprox 5/36<br>Plac 2/33    | Cele [1] 5/205<br>Cele [2] 6/196<br>Cele [3] 8/188<br>Naprox 29/174<br>Plac 3/184    | Endoscopy data not available for all patients                                                  |
| <b>C-022</b><br>RA<br>12 weeks                                | Endoscopy at baseline and 12 weeks<br>Washout:<br>NSAID 48 hrs<br>Analgesic 24 hrs<br>Piroxicam/oxaprozin 4 days<br>Investigational drug 30 days              | Cele [1] 2x100mg/day (n=240)<br>Cele [2] 2x200mg/day (n=235)<br>Cele [3] 2x400mg/day (n=217)<br>Naprox 2x500mg/day (n=225)<br>Placebo (n=231) | Cele [1] 9/223<br>Cele [2] 6/219<br>Cele [3] 8/197<br>Naprox 37/210<br>Placebo 4/200 | Cele [1] 0/23<br>Cele [2] 2/21<br>Cele [3] 1/15<br>Naprox 0/16<br>Placebo 0/16 | Cele [1] 9/200<br>Cele [2] 4/198<br>Cele [3] 7/182<br>Naprox 37/194<br>Placebo 4/184 | Endoscopy data not available for all patients                                                  |
| <b>C-062</b><br>OA/RA<br>12 weeks                             | Endoscopy at baseline, 4, 8, 12 weeks<br>Washout:<br>Investigational drug 30 days                                                                             | Cele 2x200mg/day (n=269)<br>Naprox 2x500mg/day (n=267)                                                                                        | Cele 20/269<br>Naprox 89/267                                                         | Cele 7/29<br>Naprox 12/28                                                      | Cele 11/182<br>Naprox 75/186                                                         | Aspirin status not available for all patients                                                  |
| <b>C-071</b><br>OA/RA<br>12 weeks                             | Endoscopy at baseline, 4, 8, 12 weeks<br>Washout:<br>Investigational drug (as daily therapy) 30 days                                                          | Cele 2x200mg/day (n=365)<br>Diclo 2x75mg/day (n=387)<br>Ibu 3x800mg/day (n=345)                                                               | Cele 400 25/356<br>Diclo 36/372<br>Ibu 78/334                                        | Cele 2/36<br>Diclo 8/32<br>Ibu 12/41                                           | Cele 23/258<br>Diclo 28/274<br>Ibu 66/235                                            | Endoscopy data not available for all patients<br>Aspirin status not available for all patients |
| <b>C-041</b><br>RA<br>24 weeks                                | Endoscopy at 24 weeks<br>Washout: not specified                                                                                                               | Cele 2x200mg/day (n=326)<br>Diclo SR 2x75mg/day (n=329)                                                                                       | Cele 8/212<br>Diclo 33/218                                                           | no data                                                                        | no data                                                                              | Not all patients had endoscopy - depended on feasibility at the site                           |
| <b>C-849</b><br>(C-105, 106, 107 pooled)<br>OA/RA<br>12 weeks | Endoscopy at baseline and 12 weeks<br>Washout:<br>Investigational drug 30 days                                                                                | Cele 2x100mg/day (n=440)<br>Diclo 2x50mg/day (n=440)                                                                                          | Cele 11/398<br>Diclo 20/390                                                          | Cele 0/7<br>Diclo 1/11                                                         | Cele 11/390<br>Diclo 19/378                                                          | Endoscopy data not available for all patients                                                  |

Exclusions: Active GI disease [all]; treatment for UGI ulcer within 30 days [C-021, 022, 062, 071]; ulcer (3mm diam) at baseline [C-021, 022, 849, 062, 071]; >10 erosions in stomach or duodenum at baseline [C-021, C-022]

Cele = celecoxib; Diclo = diclofenac; GI = gastrointestinal; Ibu = ibuprofen; Naprox = naproxen; NSAID = nonsteroidal anti-inflammatory drug; Plac = placebo; UGI = upper gastrointestinal.
